# Supplementary material for: Synthesis, structure and gas adsorption properties of a stable microporous Cu-based metal–organic framework assembled from a T-shaped pyridyl dicarboxylate ligand
Source: Royal Society of Chemistry journal article supplement (doi:10.1039/c7ra01125c), 2017-01-01
Supplement: c7ra01125c1.pdf [file c7ra01125c1.pdf]

## Supporting Information

**Synthesis, structure and gas adsorption properties of a stable microporous metal-organic framework assembled from T-shaped pyridyl dicarboxylate ligand**

Di Wang, Libo Sun, Yuchuan Liu, Jianfeng Du, Shun Wang, Xiaowei Song\*  
and Zhiqiang Liang\*

*State Key Laboratory of Inorganic Synthesis and Preparative Chemistry, College of Chemistry, Jilin University, Changchun 130012, P. R. China*

*E-mail: [xiaoweisong@jlu.edu.cn](mailto:xiaoweisong@jlu.edu.cn); [liangzq@jlu.edu.cn](mailto:liangzq@jlu.edu.cn)*

*Fax: +86-431-85168609*

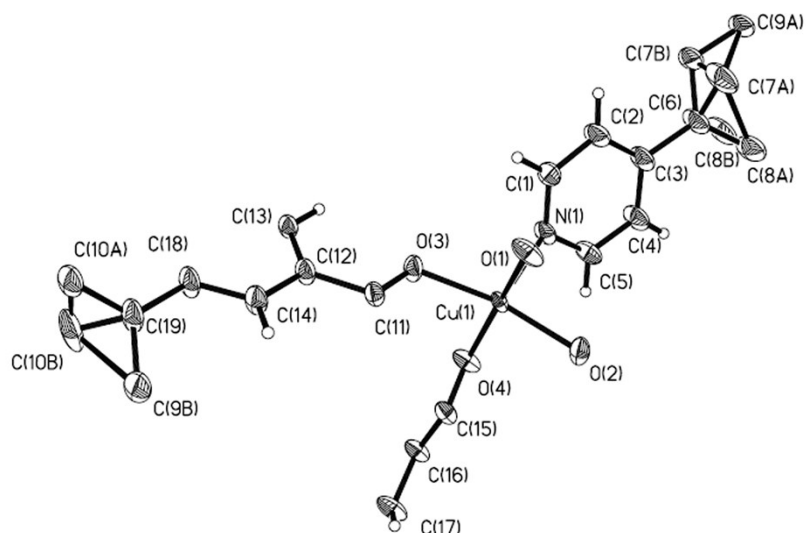

**Fig.S1** Representations of the asymmetric units of compounds **1** showing ellipsoid at the 50% probability level.

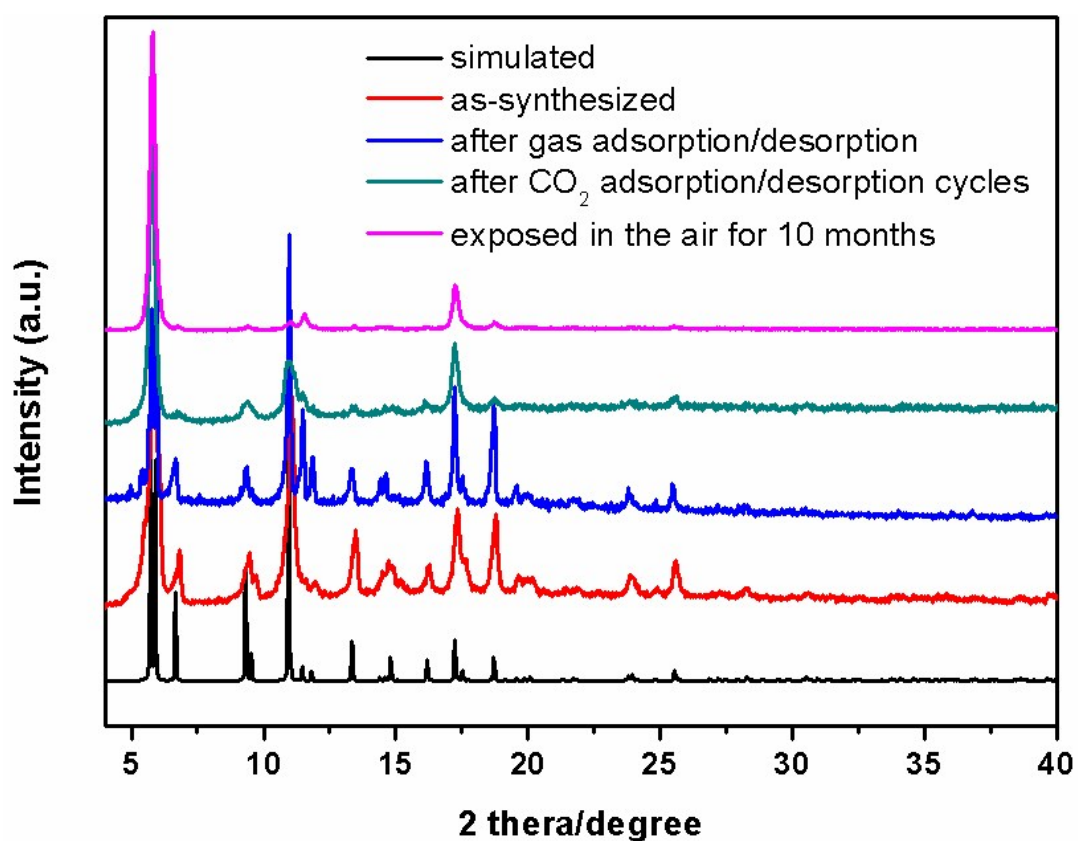

**Fig.S2** Powder X-ray diffraction patterns of the simulated, as-synthesized, after gas adsorption/desorption measurements, after CO<sub>2</sub> adsorption/desorption cycles and exposed in the air for 10 months of compound **1**.

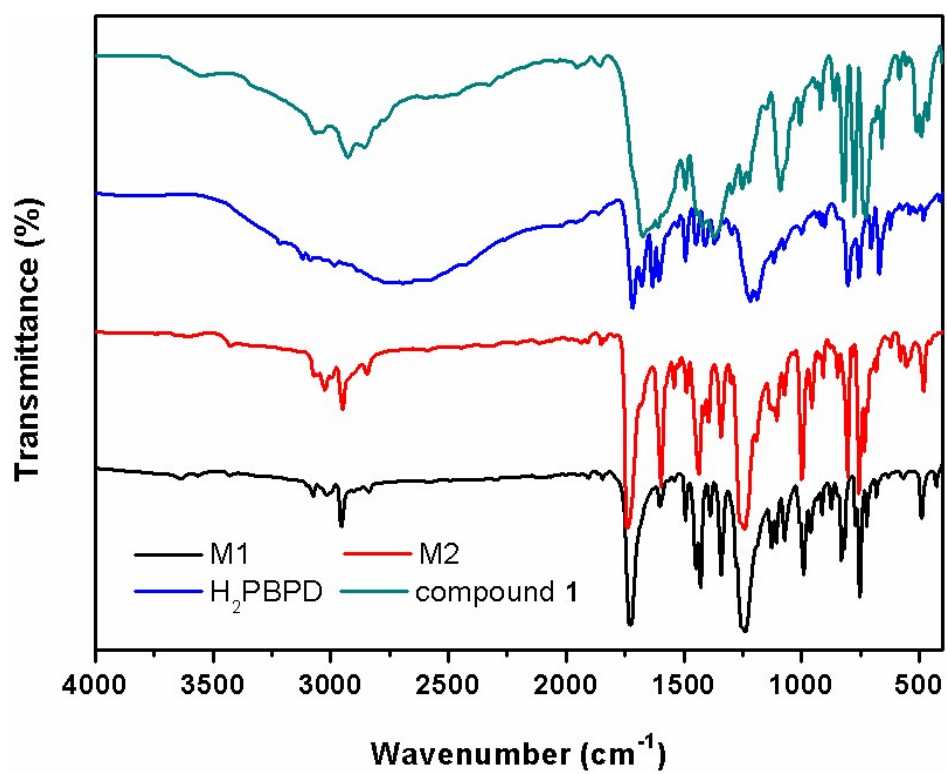

Fig.S3 Infra-red spectra of M1, M2, H<sub>2</sub>PBD and compound 1.

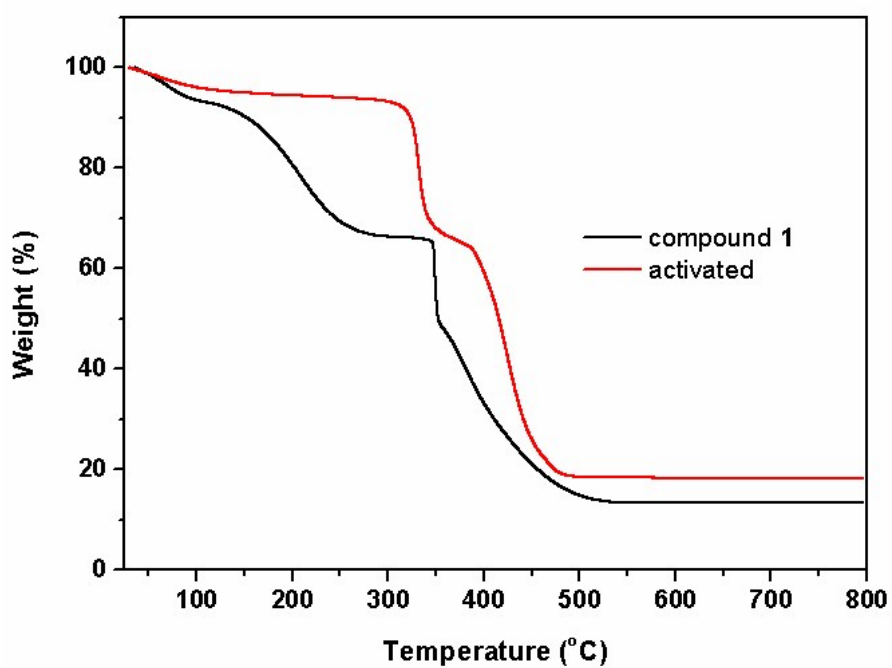

Fig. S4 TGA curves of compound 1 and activated.

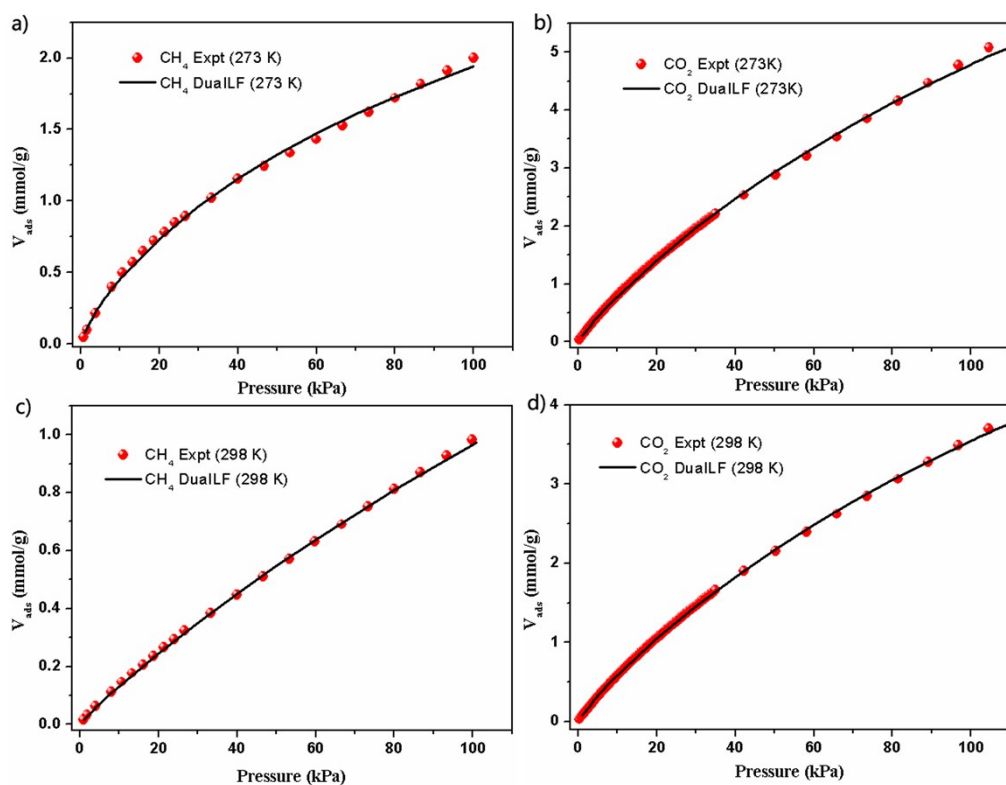

**Fig. S5** Measured  $CH_4$  and  $CO_2$  isotherms at 273 K and 298 K along with the DSLF fits for compound **1**.

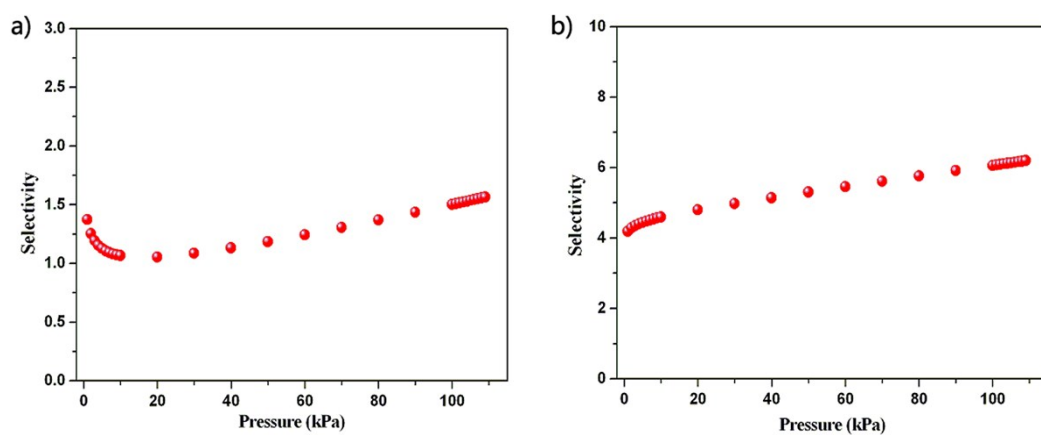

**Fig. S6** IAST predicted equimolar gas mixture adsorption selectivities at 273 K (a) and 298 K (b) for compound **1**.

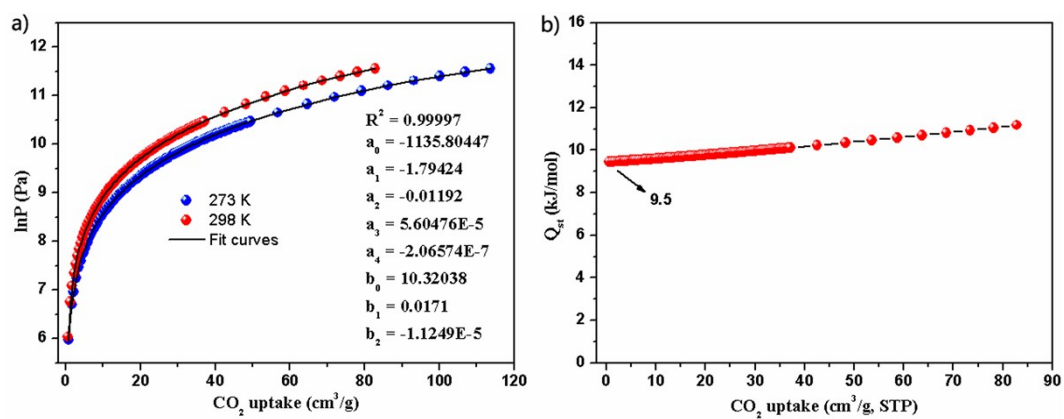

**Fig.S7** (a) Nonlinear curves fitting of  $\text{CO}_2$  for compound **1** at 273 K and 298 K; (b) Isostatic heat of  $\text{CO}_2$  for for compound **1**.

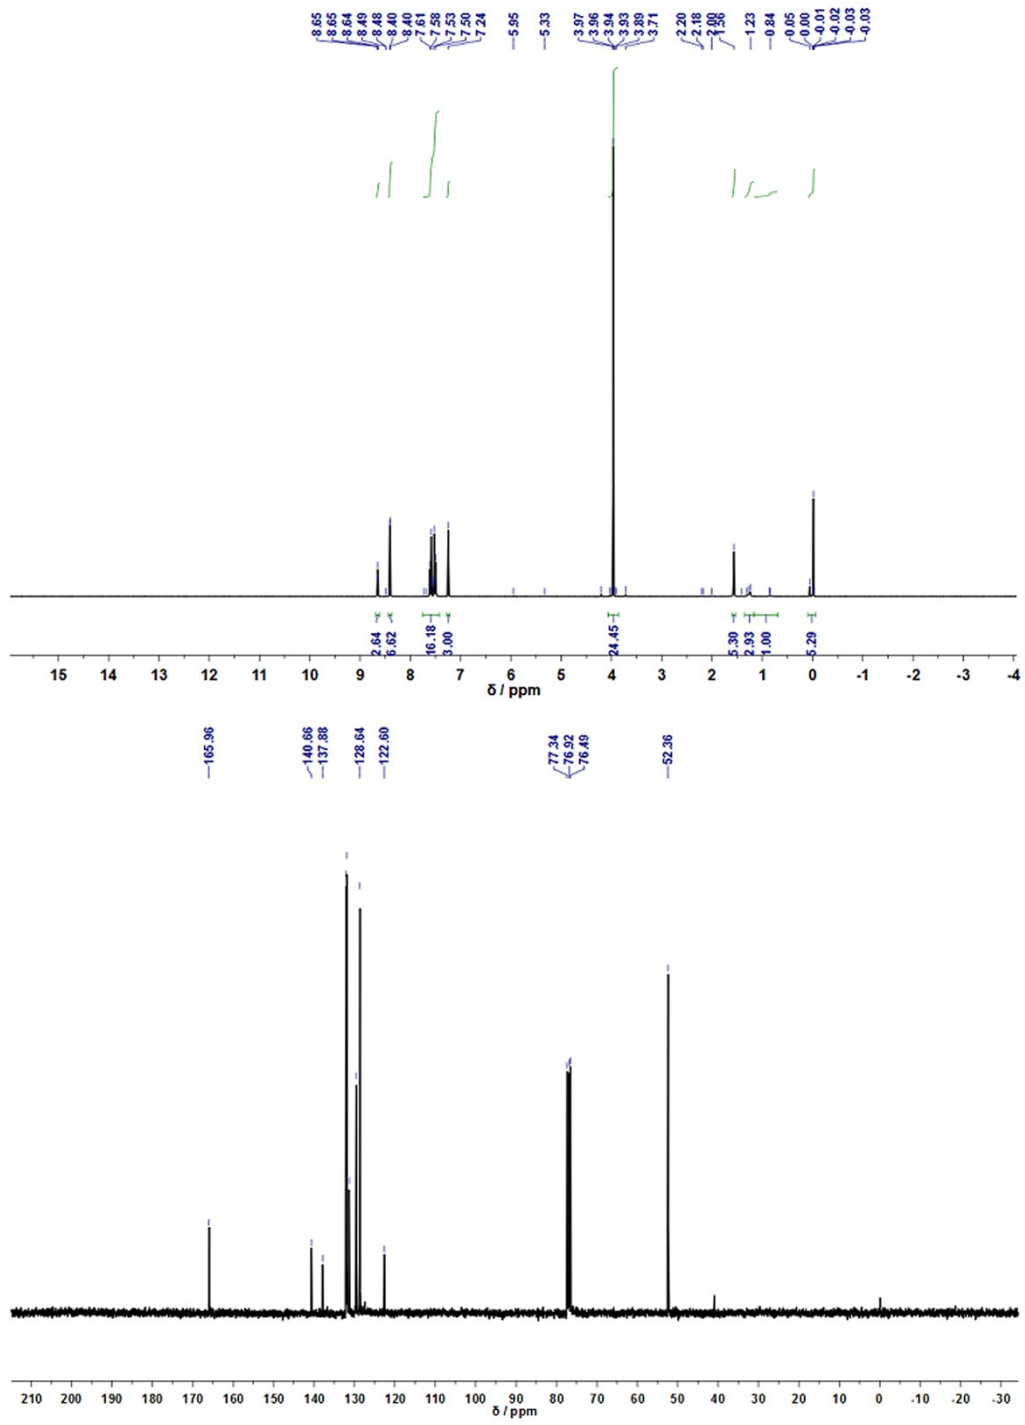

**Fig.S8** The  $^1\text{H}$  and  $^{13}\text{C}$  NMR spectra of M1.

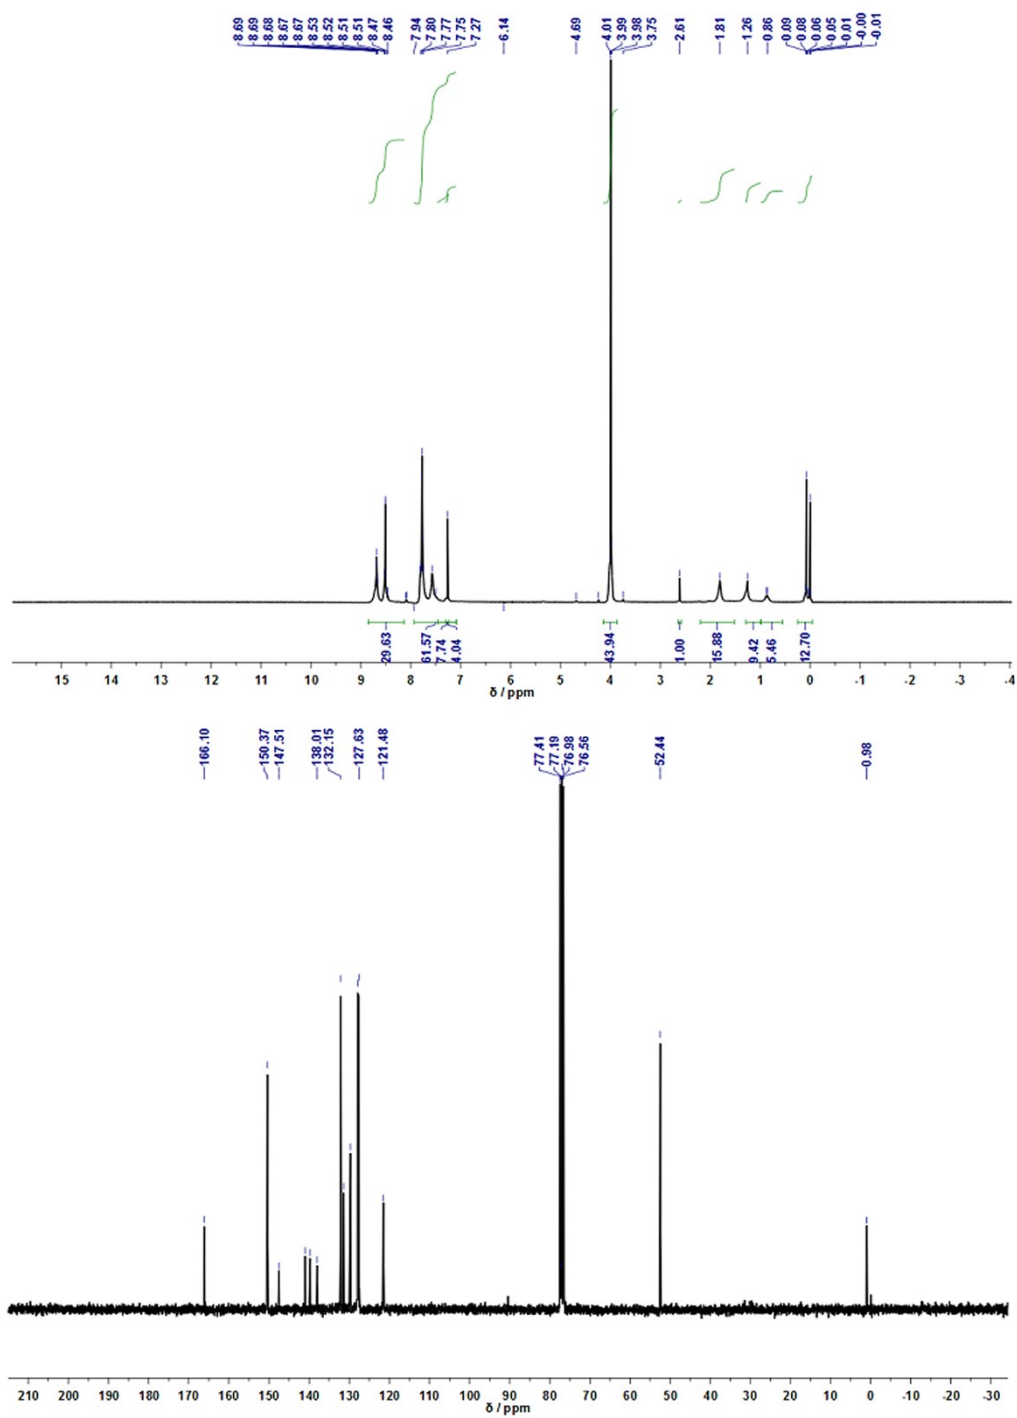

Fig.S9 The  $^1\text{H}$  and  $^{13}\text{C}$  NMR spectra of M2.

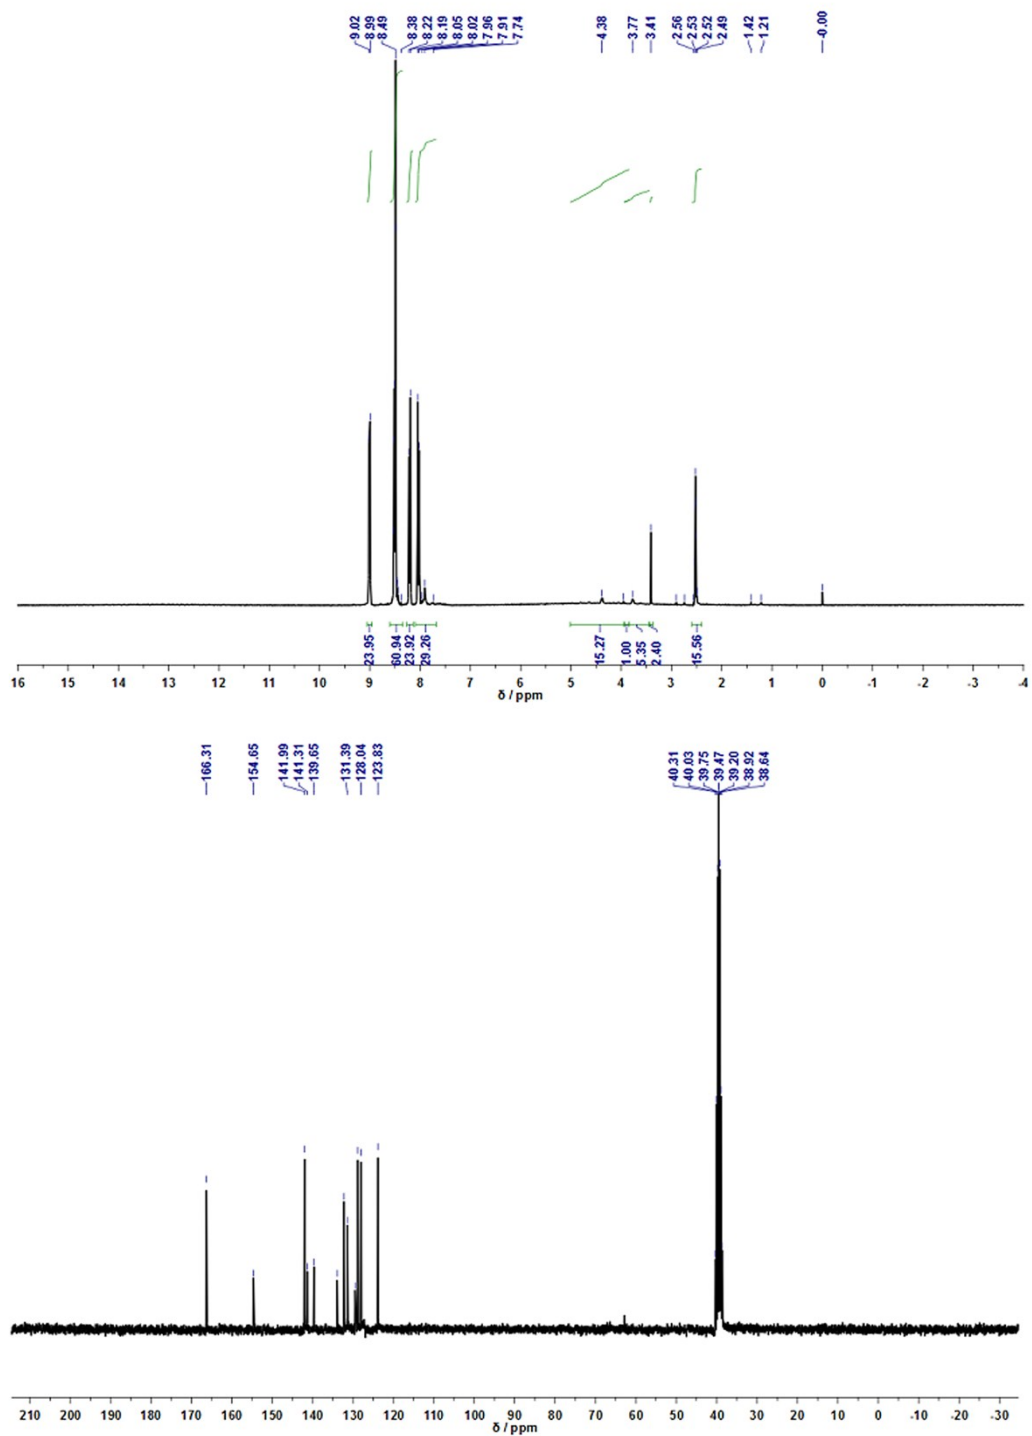

**Fig.S10** The <sup>1</sup>H and <sup>13</sup>C NMR spectra of H<sub>2</sub>PBDP.



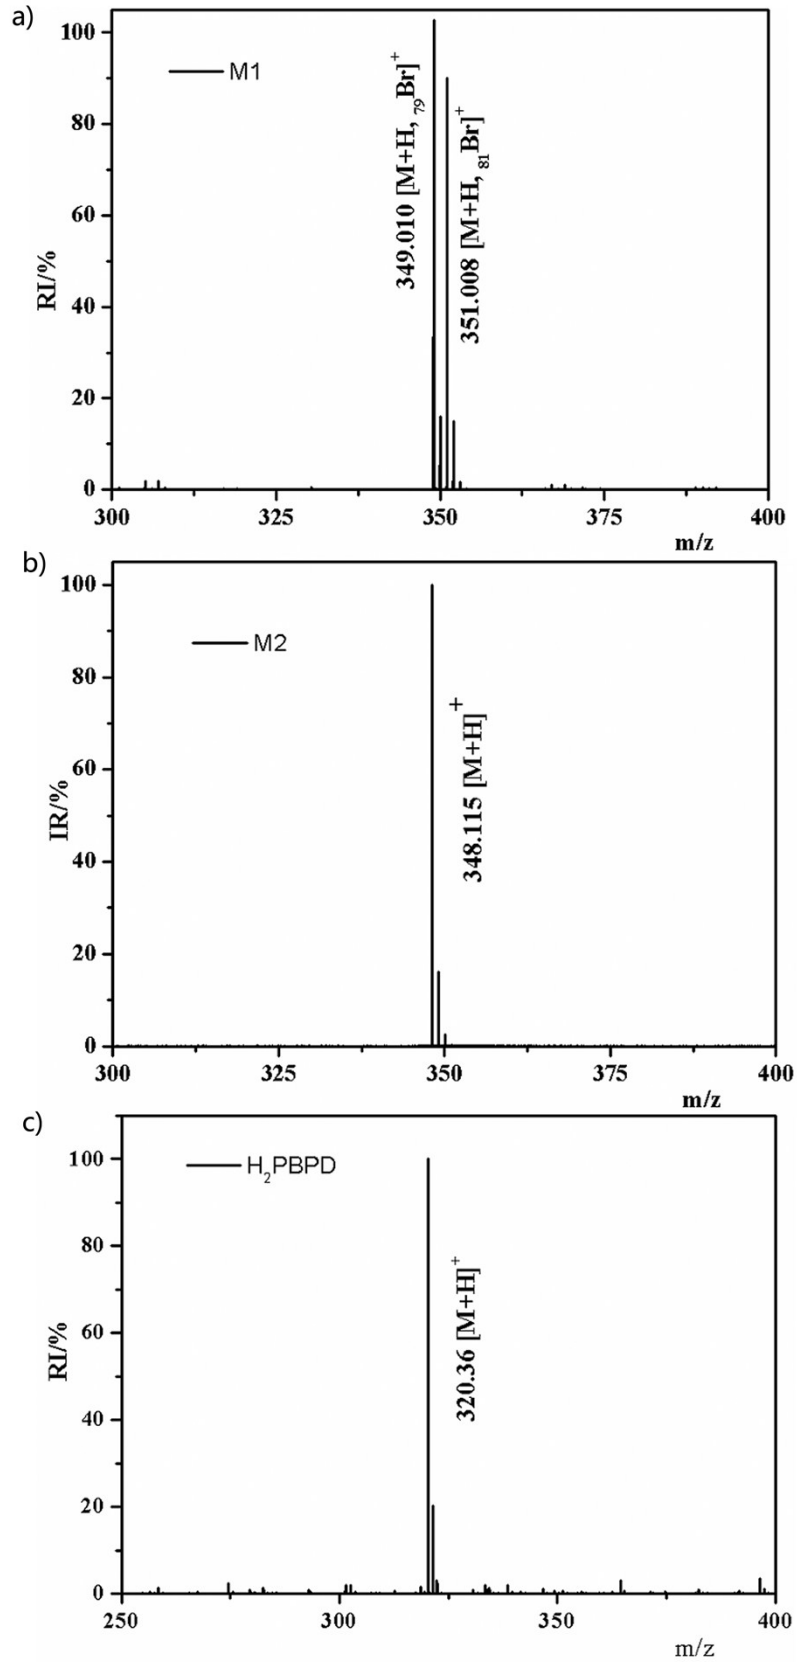

Fig.S11 MS of M1, M2 and H<sub>2</sub>PBPD.

**Table S1** Crystal Data and Structure Refinement for compound **1**.<sup>a</sup>

|                                                                  |                                                                                                                           |
|------------------------------------------------------------------|---------------------------------------------------------------------------------------------------------------------------|
| Formula                                                          | C <sub>25</sub> H <sub>31</sub> N <sub>3</sub> O <sub>9</sub> Cu                                                          |
| Formula weight                                                   | 580.14                                                                                                                    |
| Temperature                                                      | 296(2) K                                                                                                                  |
| Wavelength                                                       | 0.71073 Å                                                                                                                 |
| Crystal system, space group                                      | Hexagonal, <i>R</i> -3                                                                                                    |
| Unit cell dimensions                                             | $a = 18.9711(9)$ Å $\alpha = 90^\circ$<br>$b = 18.9711(9)$ Å $\beta = 90^\circ$<br>$c = 44.954(2)$ Å $\gamma = 120^\circ$ |
| Volume                                                           | 14011.3(11) Å <sup>3</sup>                                                                                                |
| <i>Z</i>                                                         | 18                                                                                                                        |
| Calculated density                                               | 0.812 mg/cm <sup>3</sup>                                                                                                  |
| Absorption coefficient                                           | 0.714 mm <sup>-1</sup>                                                                                                    |
| <i>F</i> (000)                                                   | 3474                                                                                                                      |
| Theta range for data collection                                  | 1.32 to 25.33°                                                                                                            |
| Limiting indices                                                 | -20 ≤ <i>h</i> ≤ 22, -22 ≤ <i>k</i> ≤ 22, -49 ≤ <i>l</i> ≤ 53                                                             |
| Reflections collected / unique                                   | 30455 / 5645                                                                                                              |
| <i>R</i> <sub>int</sub>                                          | 0.0452                                                                                                                    |
| Completeness to theta = 25.33                                    | 99.1%                                                                                                                     |
| Absorption correction                                            | Semi-empirical from equivalents                                                                                           |
| Refinement method                                                | Full-matrix least-squares on <i>F</i> <sup>2</sup>                                                                        |
| Data / restraints / parameters                                   | 5645/0/262                                                                                                                |
| Goodness-of-fit on <i>F</i> <sup>2</sup>                         | 1.184                                                                                                                     |
| Final <i>R</i> indices [ <i>I</i> > 2σ( <i>I</i> )] <sup>b</sup> | <i>R</i> <sub>1</sub> = 0.0597, <i>wR</i> <sub>2</sub> = 0.2127                                                           |
| <i>R</i> indices (all data)                                      | <i>R</i> <sub>1</sub> = 0.0735, <i>wR</i> <sub>2</sub> = 0.2315                                                           |

<sup>a</sup>Date based on *PLATON/SQUEEZE* mode.

<sup>b</sup> $R_1 = \sum ||F_o| - |F_c|| / \sum |F_o|$ .  $wR_2 = [\sum [w (F_o^2 - F_c^2)^2] / \sum [w (F_o^2)]]^{1/2}$ .

**Table S2.** Selected bond lengths [Å] and angles [deg] for compound **1**.

| Bond lengths |          |
|--------------|----------|
| Cu(1)-O(3)   | 1.953(3) |
| Cu(1)-O(4)   | 1.953(3) |
| Cu(1)-O(2)   | 1.971(3) |
| Cu(1)-O(1)   | 1.971(3) |
| Cu(1)-N(1)   | 2.188(3) |
| N(1)-C(1)    | 1.333(6) |
| N(1)-C(5)    | 1.336(6) |

  

| Bond angles     |            |
|-----------------|------------|
| O(3)-Cu(1)-O(4) | 88.39(15)  |
| O(3)-Cu(1)-O(2) | 166.66(12) |
| O(4)-Cu(1)-O(2) | 89.53(16)  |
| O(3)-Cu(1)-O(1) | 89.47(16)  |
| O(4)-Cu(1)-O(1) | 166.75(12) |
| O(2)-Cu(1)-O(1) | 89.54(17)  |
| O(3)-Cu(1)-N(1) | 104.03(13) |
| O(4)-Cu(1)-N(1) | 104.09(13) |
| O(2)-Cu(1)-N(1) | 89.25(13)  |
| O(1)-Cu(1)-N(1) | 89.11(13)  |
